# Supplementary material for: Anticancer Activity and Molecular Mechanisms of an Ursodeoxycholic Acid Methyl Ester-Dihydroartemisinin Hybrid via a Triazole Linkage in Hepatocellular Carcinoma Cells
Source: MDPI journal article supplement (doi:10.3390/molecules28052358), 2023-03-03
Supplement: s1 [file s1]

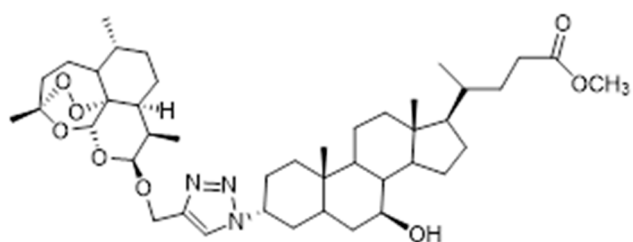

$^1\text{H}$ -NMR.

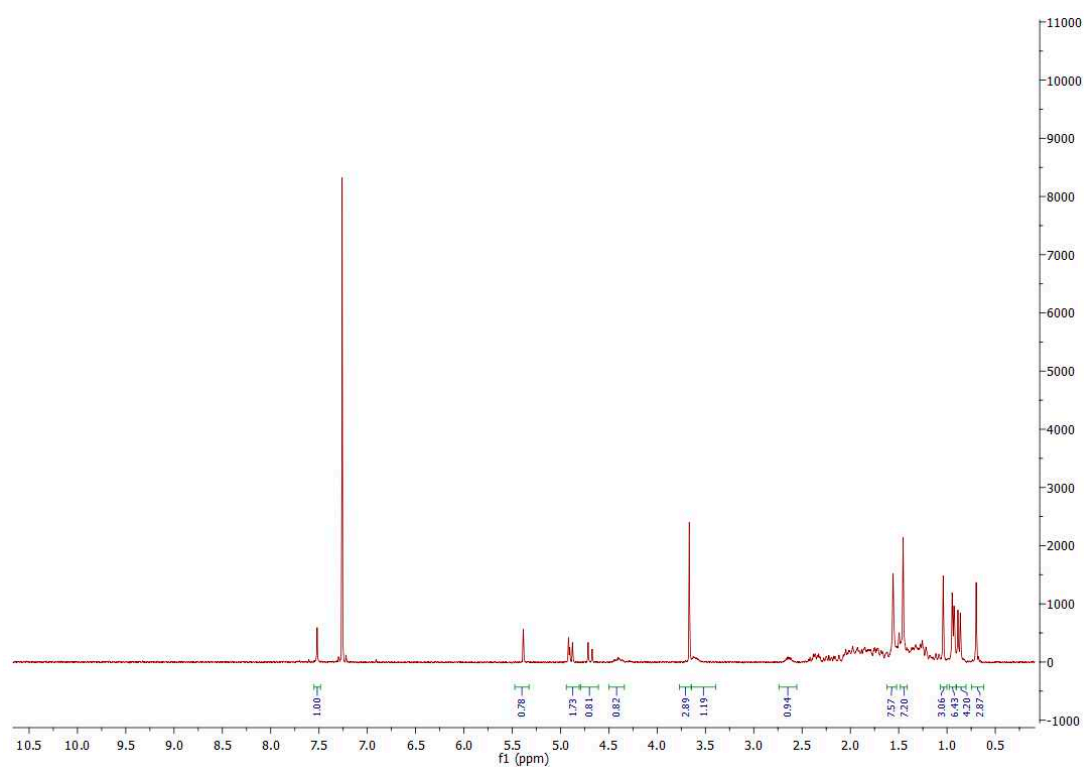

<sup>13</sup>C-NMR

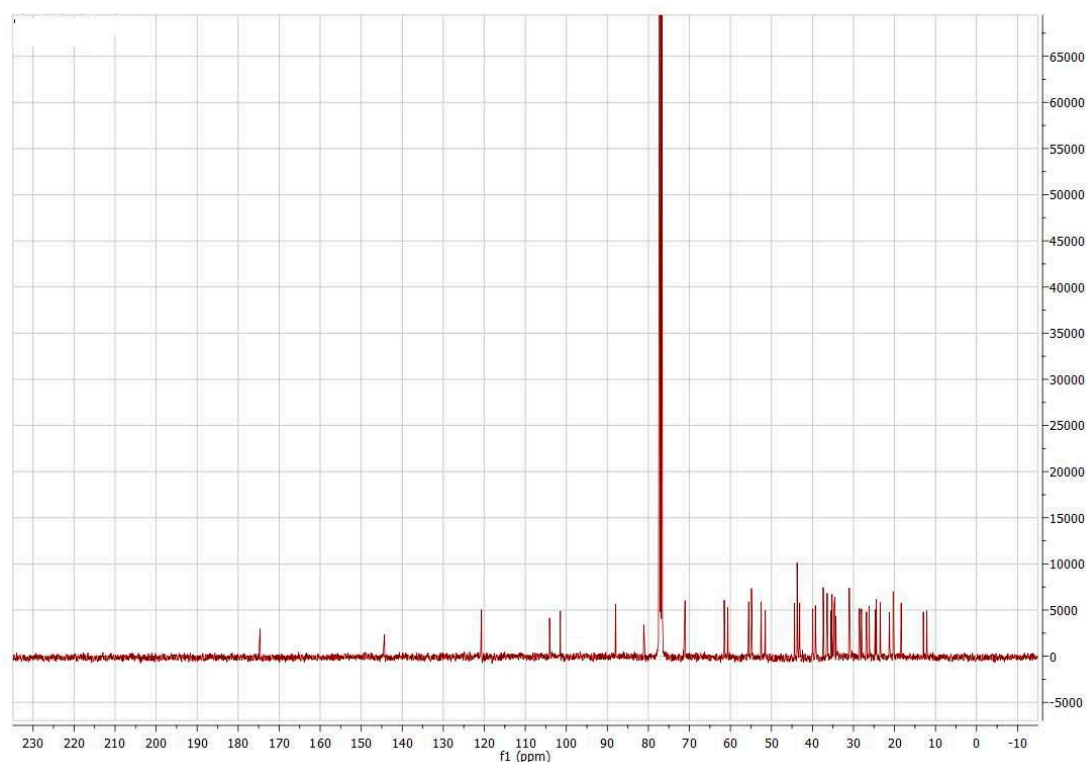

**Figure S1.** Spectroscopic data of compound UDCMe-Z-DHA: <sup>1</sup>H-NMR spectrum; <sup>13</sup>C-NMR spectrum. The crude product obtained as reported in a previous work [Ref. 19] was purified by flash chromatography on silica gel by elution with EtOAc/Cy 1:1 in presence of a pad of Florisil<sup>®</sup>. The desired product was obtained as a pure white powder. Analytical and spectroscopic data were in agreement with that reported previously [Ref. 19]. HRMS (ESI) (+) calcd for C<sub>43</sub>H<sub>68</sub>N<sub>3</sub>O<sub>8</sub> [M+H]<sup>+</sup> 754.5001, found 754.4992.

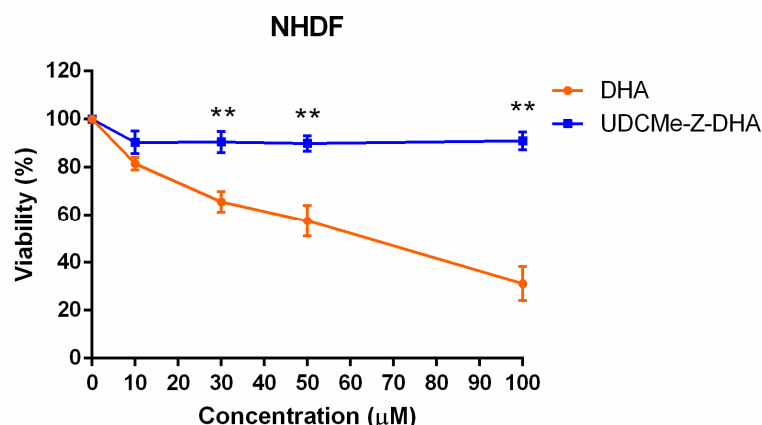

**Figure S2.** UDCMe-Z-DHA is less toxic than DHA toward normal human dermal fibroblast cells. Normal human dermal fibroblast (NHDF) cells were seeded in 96-well plates, treated with DHA or UDCMe-Z-DHA for 72 h, and cell viability was measured by the MTT assay. Data are presented as mean  $\pm$  SEM of at least three independent experiments. Statistical significance was assessed by two-tailed Student's *t*-test. \*\*  $p < 0.01$ .

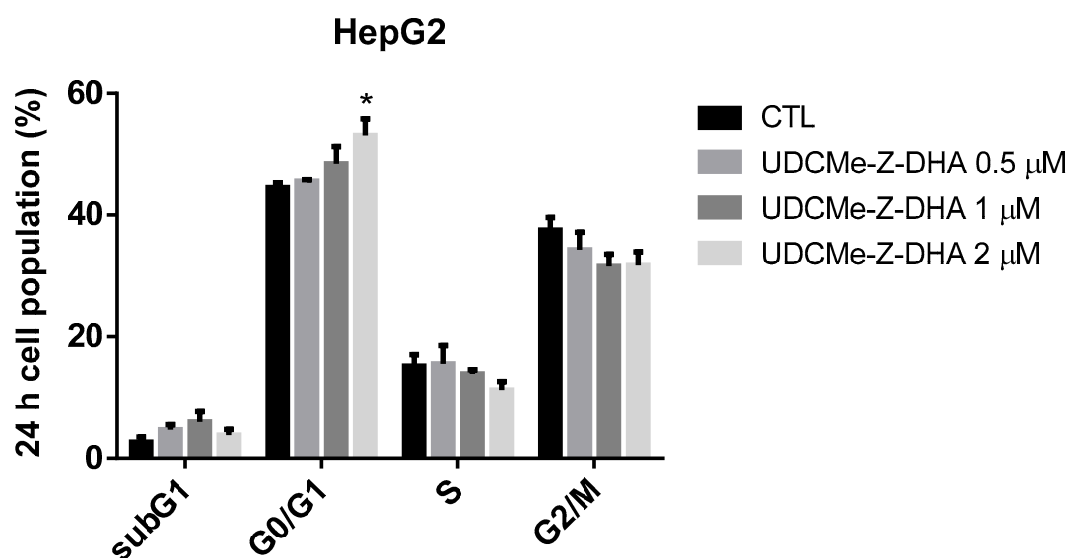

**Figure S3.** Cell cycle distribution of HepG2 cells treated with UDCMe-Z-DHA for 24 h. Cells were seeded in 12-well plates, treated with UDCMe-Z-DHA for 24 h, harvested by trypsinization, and subjected to PI staining and flow cytometric analysis. Data are presented as mean  $\pm$  SEM of at least three independent experiments. Statistical significance was assessed by two-tailed Student's *t*-test. \*  $p < 0.05$ .
